# Supplementary material
Source: MDPI journal article supplement (https://www.mdpi.com/2227-9040/11/7/400)
Supplement: s1 [file s1]

# Determination of Dipyrindamole Using a MIP-Modified Disposable Pencil Graphite Electrode

Daniel Preda <sup>1</sup>, Maria Lorena Jinga <sup>2</sup>, Iulia Gabriela David <sup>2,\*</sup> and Gabriel Lucian Radu <sup>3,\*</sup>

<sup>1</sup> Doctoral School of Chemical Engineering and Biotechnologies, University Politehnica of Bucharest, Gheorghe Polizu Street 1-7, District 1, 011061 Bucharest, Romania; daniel.preda1208@stud.chimie.upb.ro

<sup>2</sup> Department of Analytical Chemistry and Physical Chemistry, Faculty of Chemistry, University of Bucharest, Panduri Av. 90-92, District 5, 050663 Bucharest, Romania; maria.jinga@s.unibuc.ro

<sup>3</sup> National Institute of Biological Sciences, Centre of Bioanalysis, Splaiul Independentei 296, District 6, 060031 Bucharest, Romania

\* Correspondence: gabriela.iulia.david@g.unibuc.ro (I.G.D.); lucian.radu@incdsb.ro (G.L.R.)

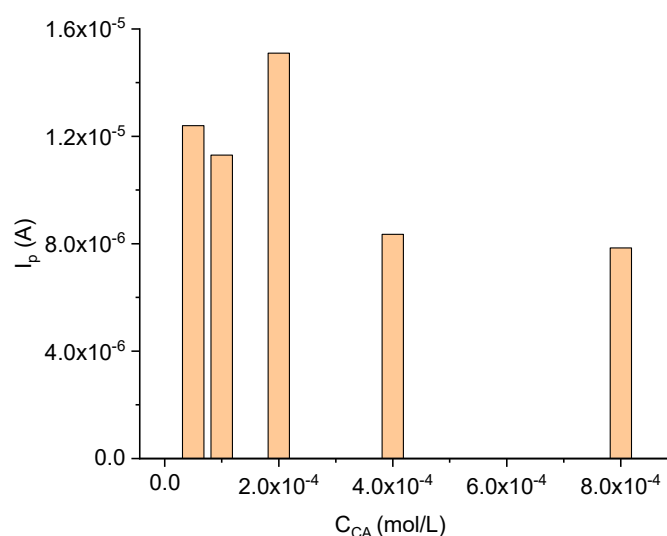

**Figure S1.** The effect of CA concentration in the polymerization mixture on  $2.00 \times 10^{-5}$  mol/L DIP oxidation peak current ( $I_p$ ) recorded by DPV in PBS pH = 7.00 using MIP\_PGE; Polymerization conditions:  $C_{DIP} = 4.00 \times 10^{-5}$  mol/L; PBS pH = 7.00; HB\_PGE; 5 voltammetric cycles between 0.000 and 2.000 V; scan rate 0.100 V/s.

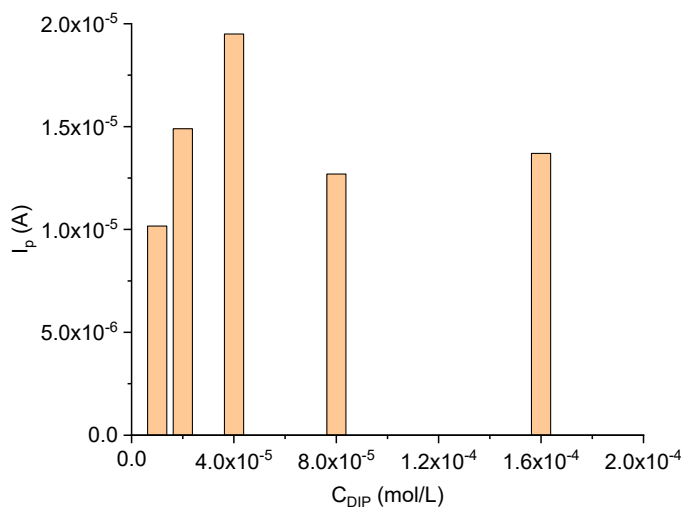

**Figure S2.** The effect of the template (DIP) concentration in the polymerization mixture containing  $2.00 \times 10^{-4}$  mol/L CA (monomer) on  $2.00 \times 10^{-5}$  mol/L DIP oxidation peak current recorded by DPV in PBS pH = 7.00 using MIP\_PGE; Polymerization conditions:  $C_{CA} = 2.00 \times 10^{-4}$  mol/L; PBS pH = 7.00; HB\_PGE; 5 voltammetric cycles between 0.000 and 2.000 V; scan rate 0.100 V/s.

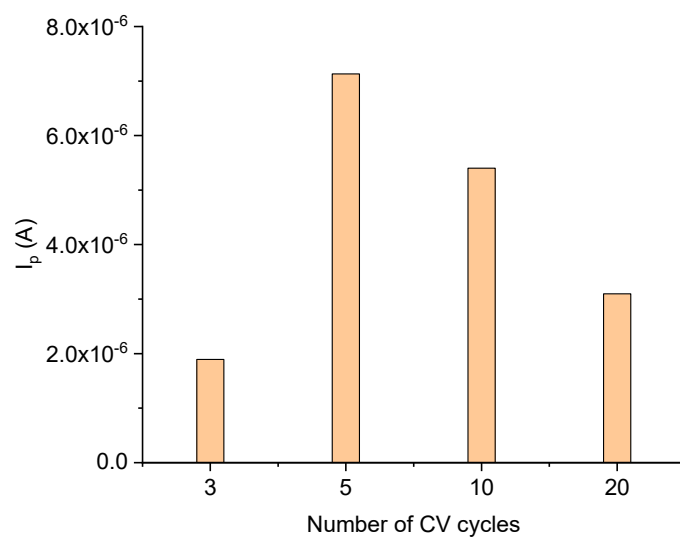

**Figure S3.** Comparison of the DIP responses on  $7.50 \times 10^{-6}$  mol/L DIP in PBS pH = 7.00 at PGE modified with MIP prepared by electropolymerization at different numbers of voltametric cycles. Polymerization conditions:  $C_{CA} = 2.00 \times 10^{-4}$  mol/L;  $C_{DIP} = 4.00 \times 10^{-5}$  mol/L; PBS pH = 7.00; HB\_PGE; potential scanned between 0.000 and 2.000 V; scan rate 0.100 V/s.

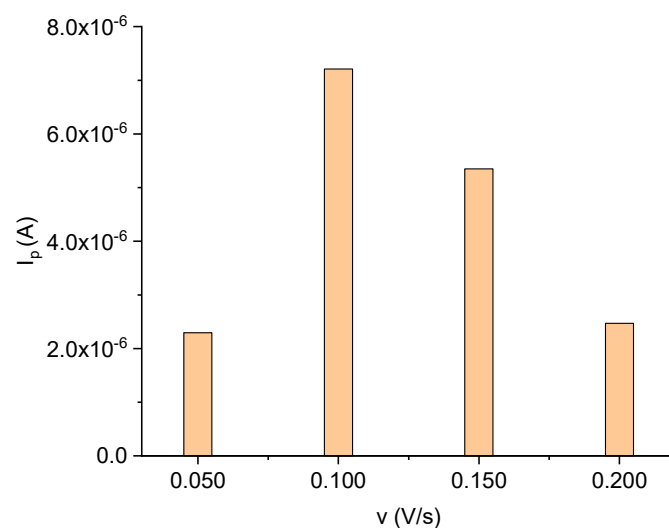

**Figure S4.** Comparison of the DIP responses on  $7.50 \times 10^{-6}$  mol/L DIP in PBS pH = 7.00 at PGE modified with MIP prepared by electropolymerization at different scan rates ( $v$ ). Polymerization conditions:  $C_{CA} = 2.00 \times 10^{-4}$  mol/L;  $C_{DIP} = 4.00 \times 10^{-5}$  mol/L; PBS pH = 7.00; HB\_PGE; potential scanned between 0.000 and 2.000 V; 5 voltammetric cycles.

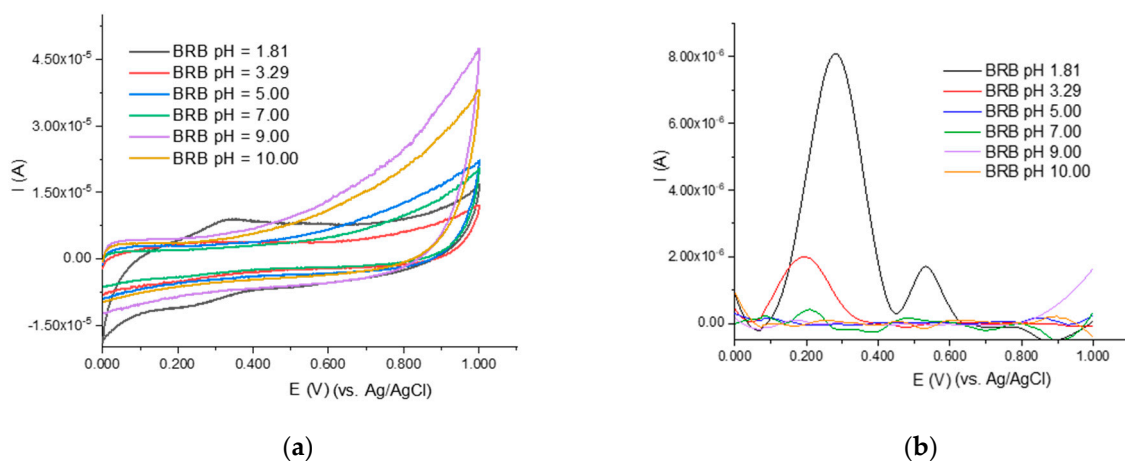

**Figure S5.** Cyclic (scan rate 0.100 V/s) (a) and differential pulse voltammograms (b) recorded at MIP\_PGE for electrolyte solutions of BRB with different pH values.

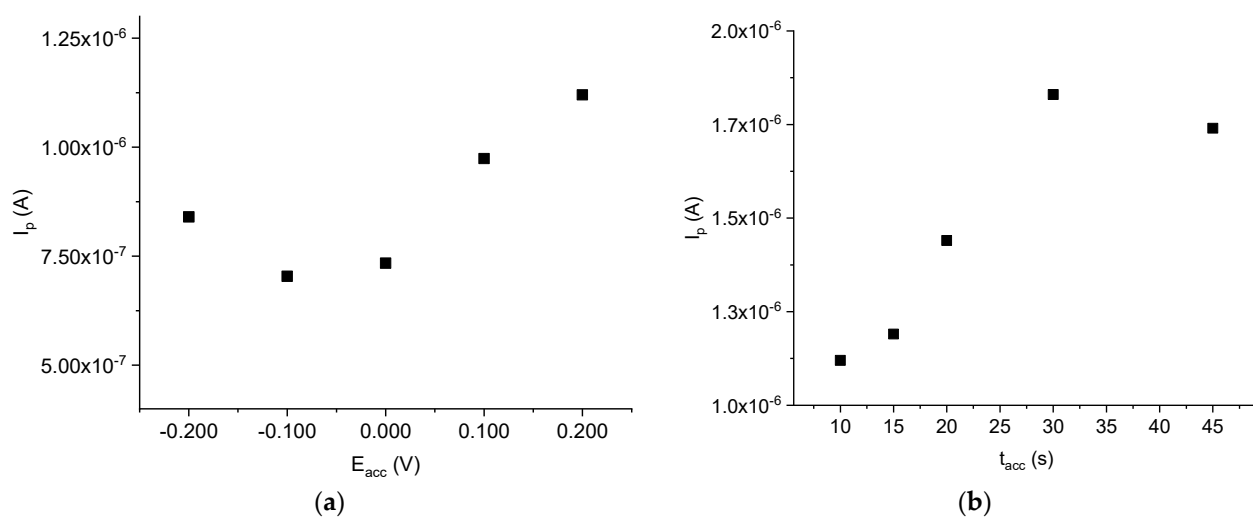

**Figure S6.** Variation of DPV peak current recorded at MIP\_PGE for a  $1.00 \times 10^{-7}$  mol/L DIP in PBS pH = 7.00 with the accumulation potential (a) and time (b).
